# Supplementary material
Source: PubMed Central journal article supplement (PMC2652187)

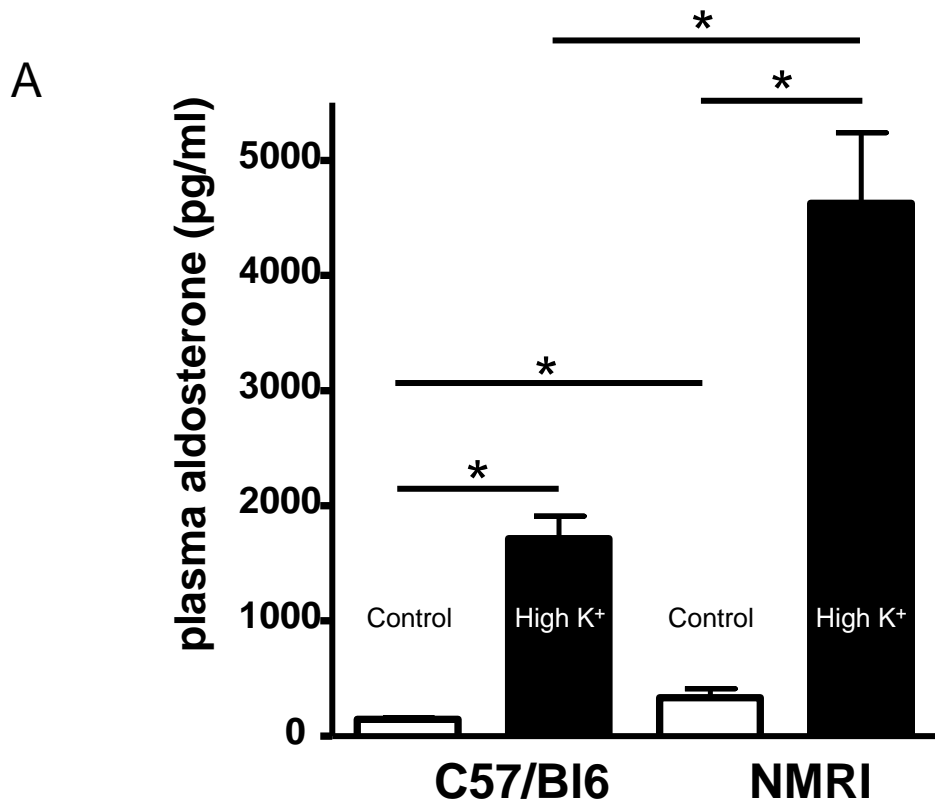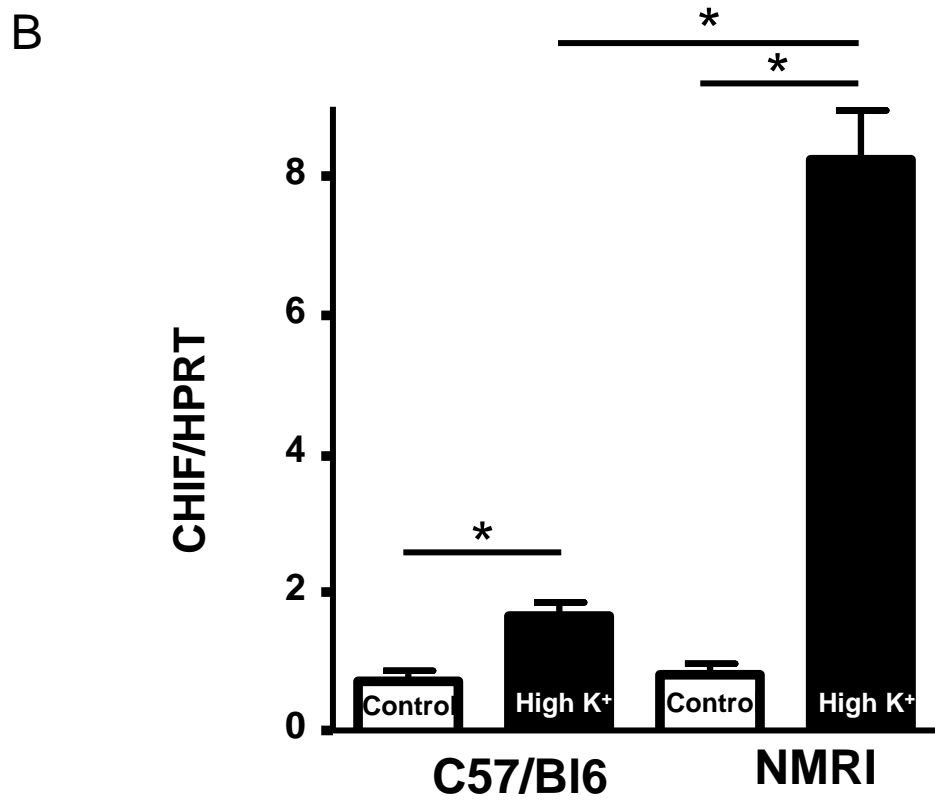

Supplement: 2008.156968_1.pdf [file 2008.156968_1.pdf]

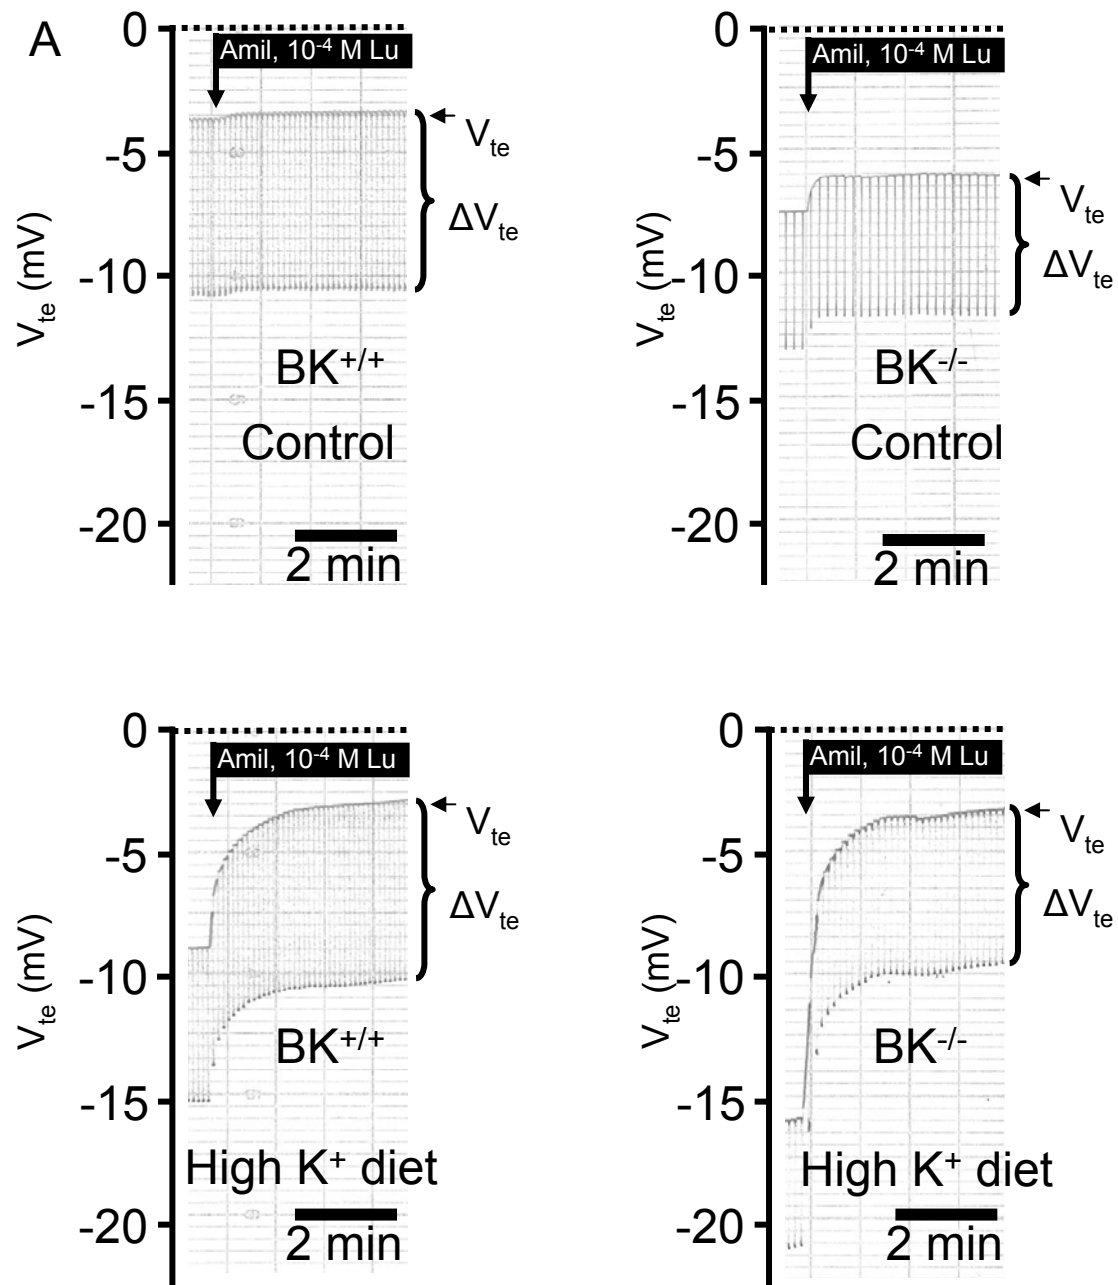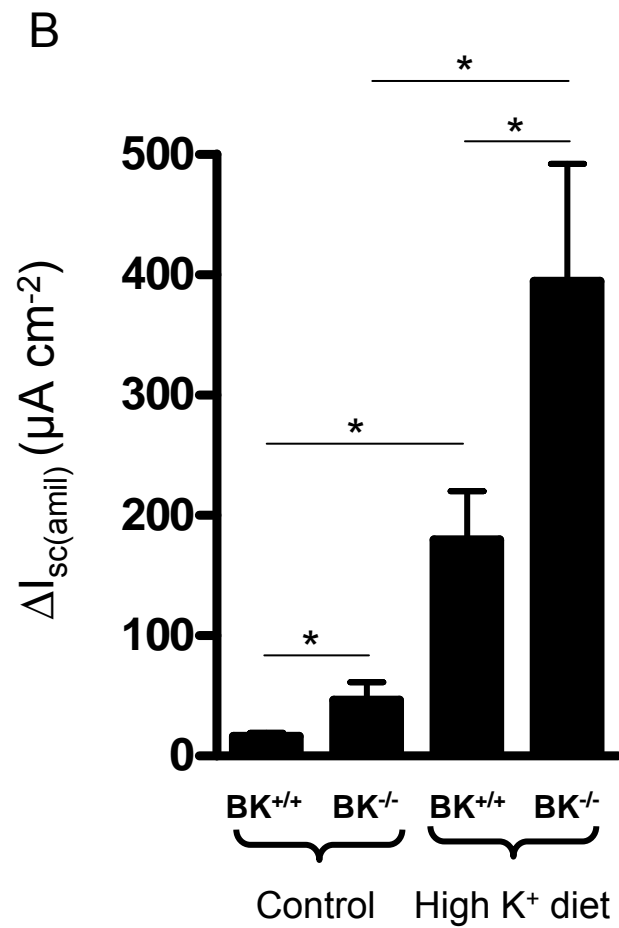

Supplementary  
Fig. 2

Supplement: 2008.156968_2.pdf [file 2008.156968_2.pdf]
